# Supplementary material
Source: HighWire-hosted journal article supplement (https://qdcxjkg.com/highwire/filestream/112851/field_highwire_adjunct_files/1/Figures_E1-E3.pdf)
Supplement: Figures_E1-E3.pdf [file Figures_E1-E3.pdf]

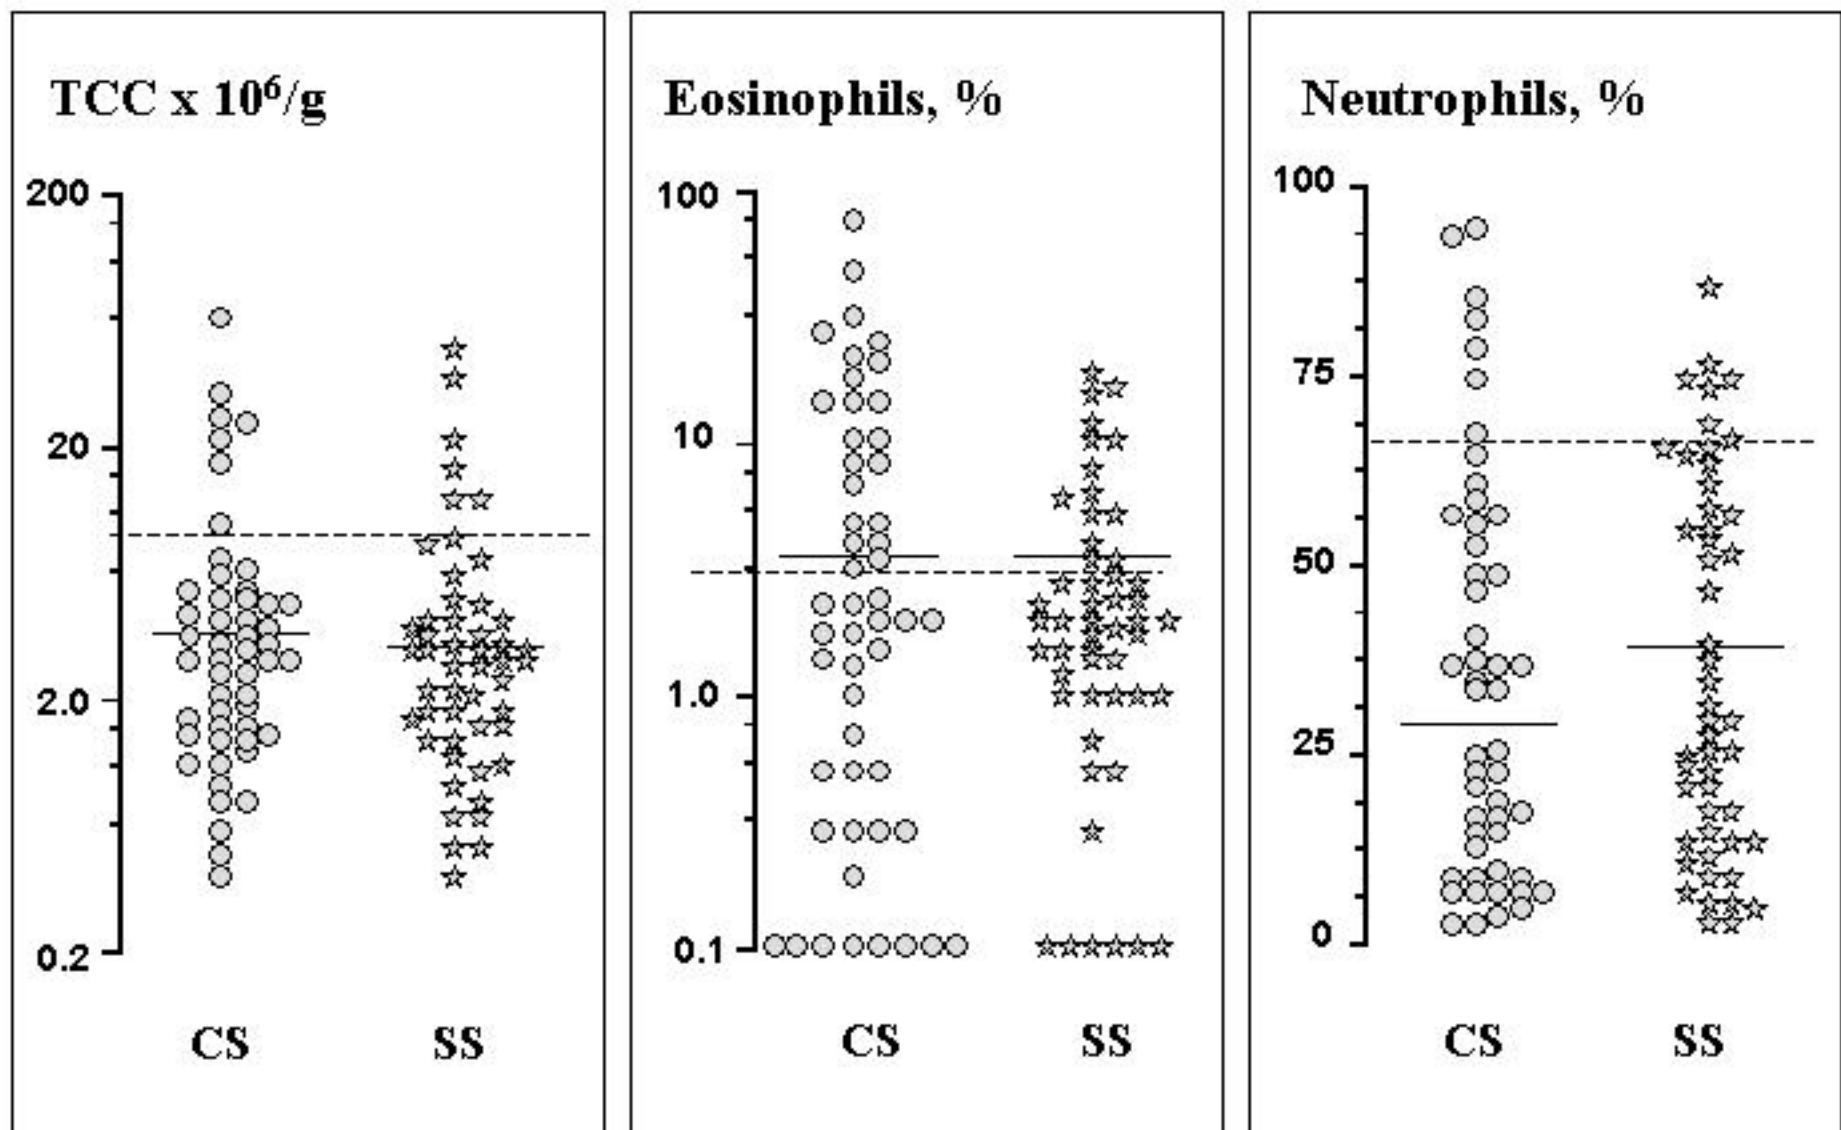

Figure E1

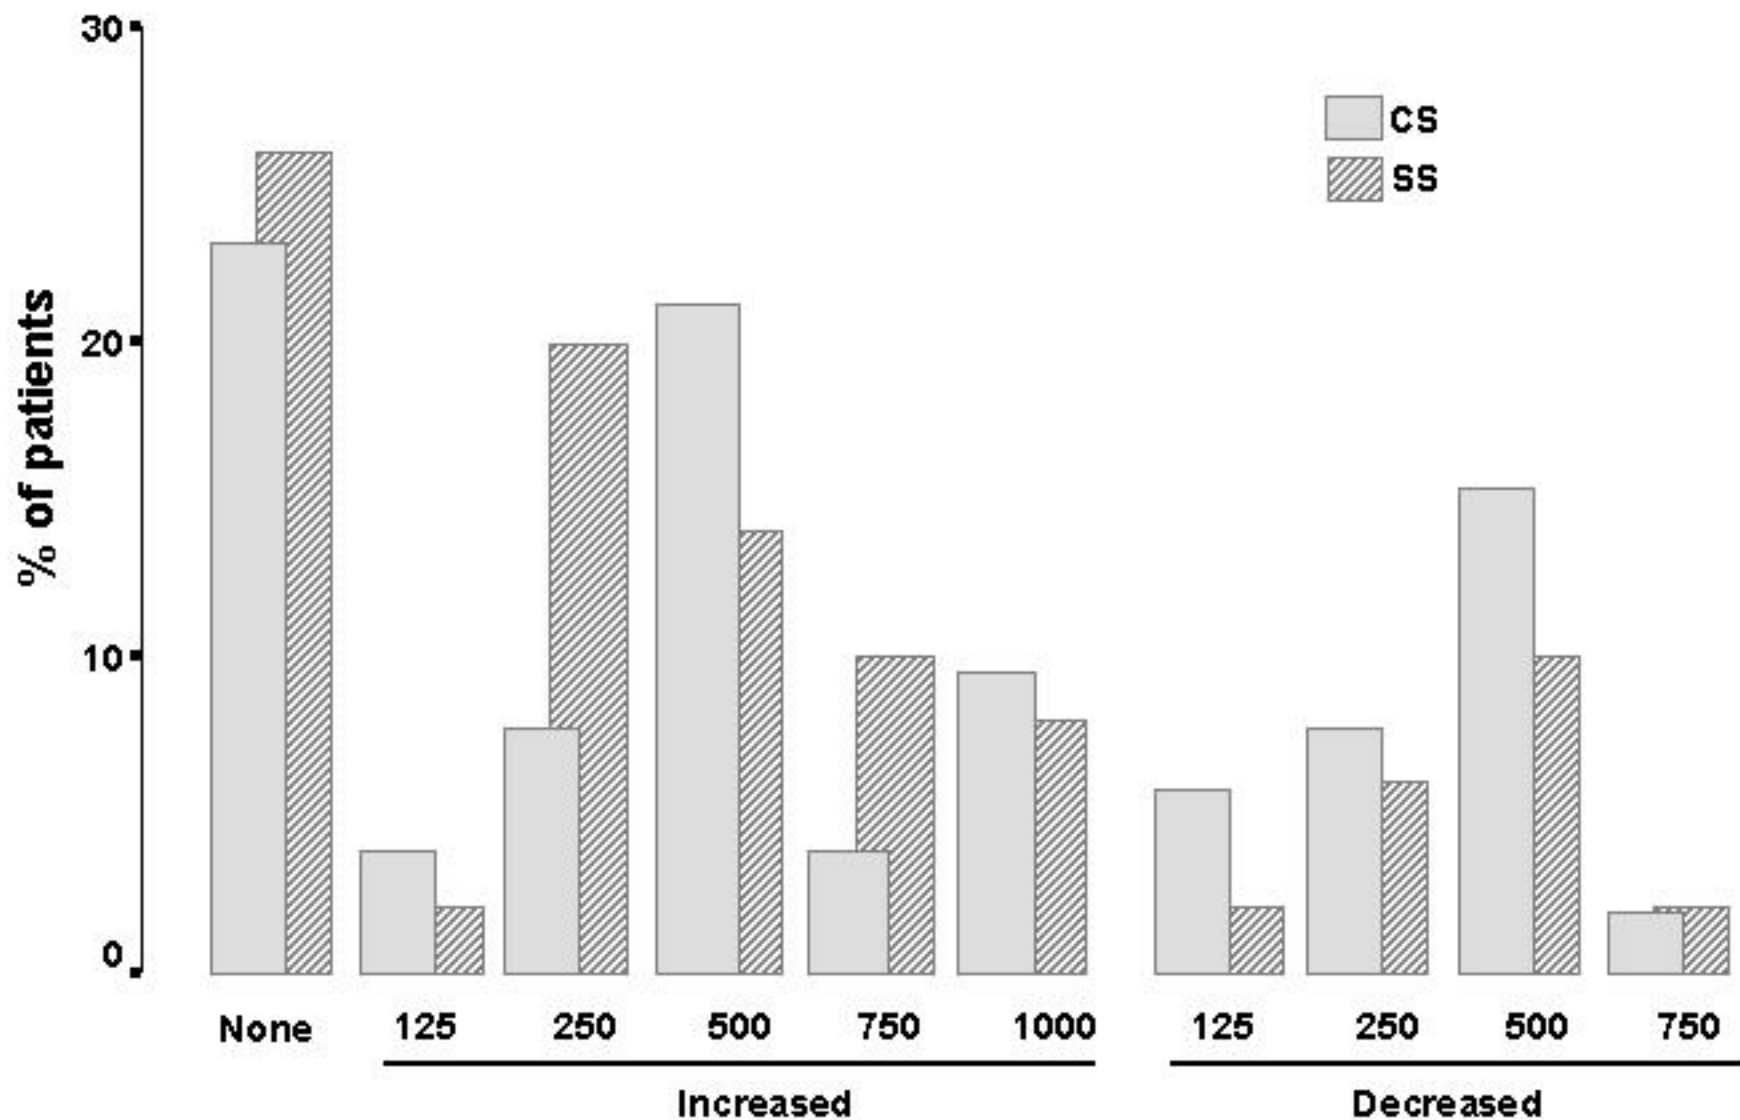

**Δ in dose of fluticasone equivalent (μg) from baseline to maintenance**

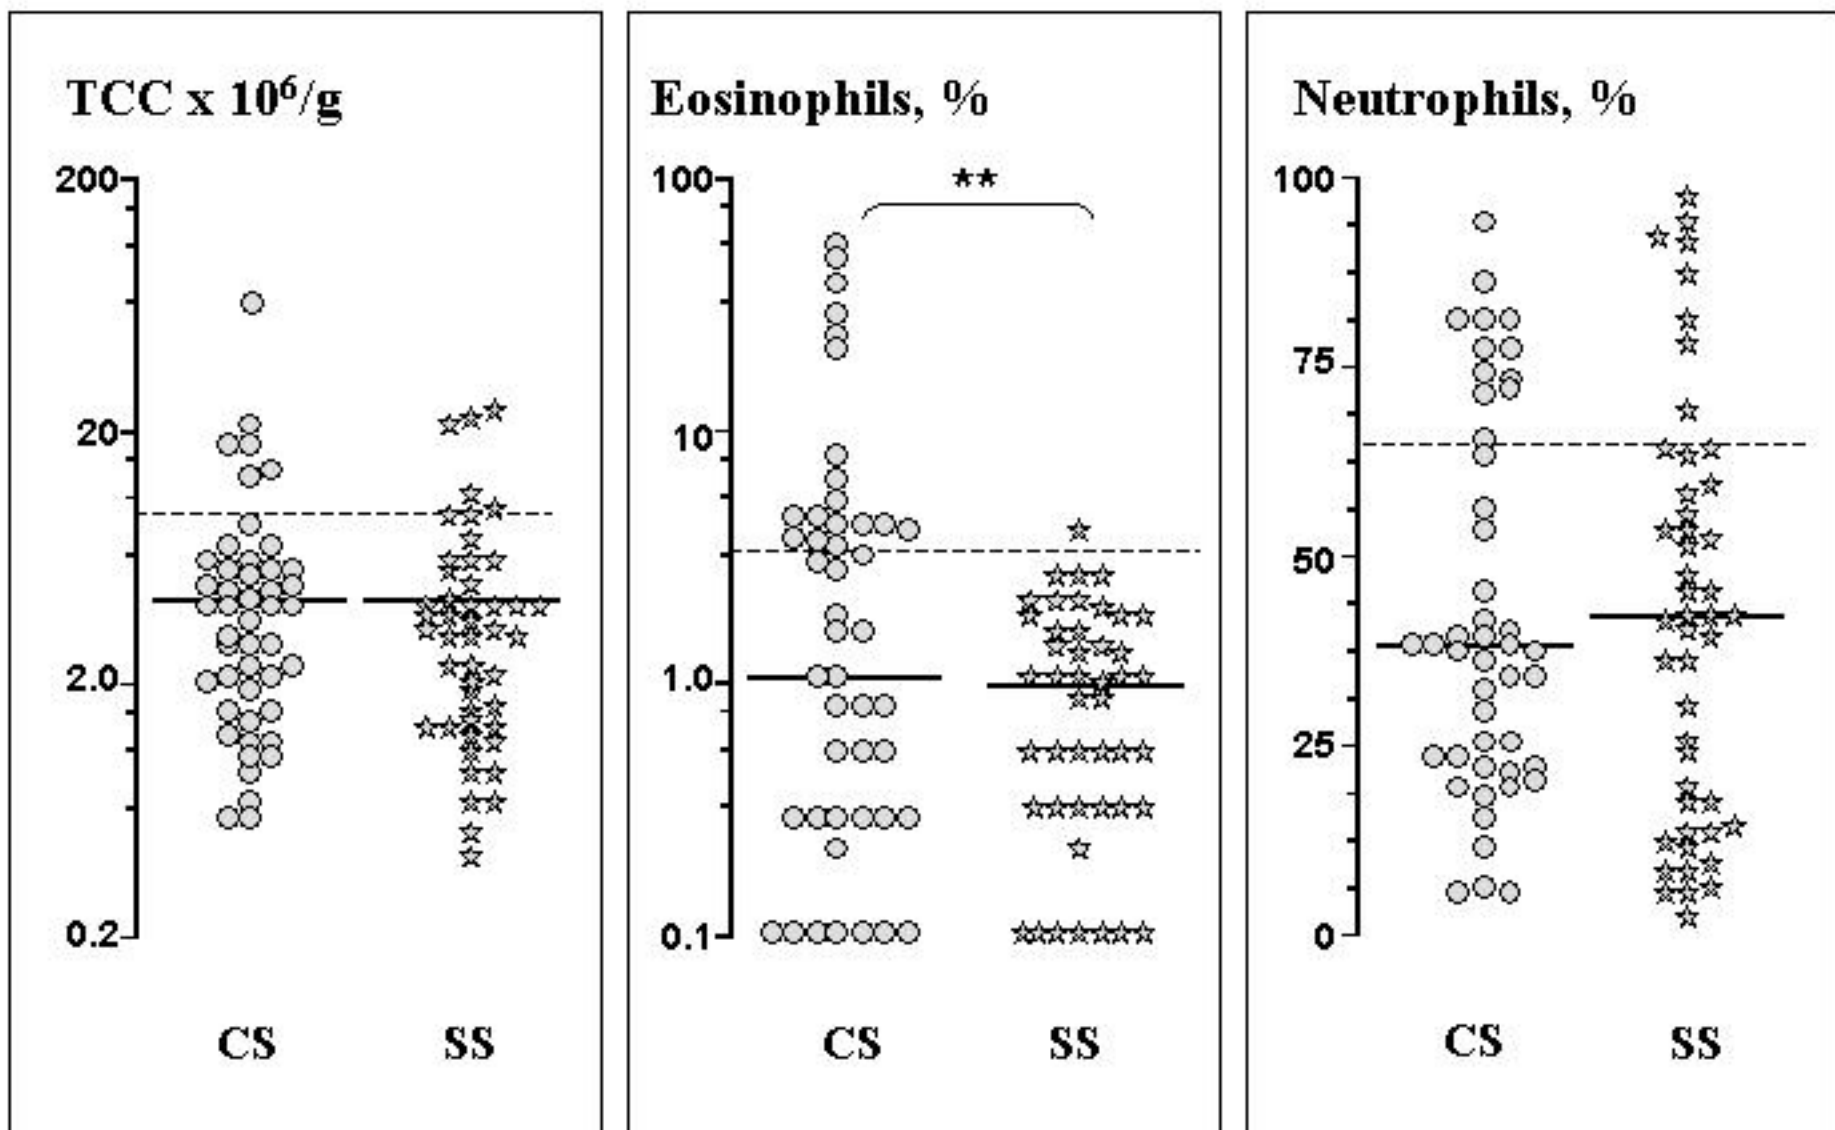

Figure E3
